1

## 2 **incR: a new R package to analyse incubation behaviour**

3 Pablo Capilla-Lasheras

4 ORCID 0000-0001-6091-7089

5 [p.capilla@exeter.ac.uk](mailto:p.capilla@exeter.ac.uk) / [pacapilla@gmail.com](mailto:pacapilla@gmail.com)

6 Centre for Ecology and Conservation, College of Life and Environmental Sciences, University of

7 Exeter, Penryn, UK

8

9 **Keywords:** incubation, R package, software, nest temperatures

10

11

12

13

14

15

16

17

18

19

20

21

22

23

24

25

26 **Abstract**

27 Incubation represents a life stage of crucial importance for the optimal development of avian  
28 embryos. For most birds, incubation poses a trade-off between investing in self-maintenance  
29 and offspring care. Furthermore, incubation is affected by environmental temperatures and,  
30 therefore, will be likely impacted by climate change. Despite its relevance and readily  
31 available temperature logging methods, avian incubation research is hindered by recognised  
32 limitations in available software. In this paper, a new quantitative approach to analyse  
33 incubation behaviour is presented. This new approach is embedded in a free R package,  
34 `incR`. The flexibility of the R environment eases the analysis, validation and visualisation of  
35 incubation temperature data. The core algorithm in `incR` is validated here and it is shown  
36 that the method extracts accurate metrics of incubation behaviour (e.g. number and duration  
37 of incubation bouts). This paper also presents a suggested workflow along with detailed R  
38 code to aid the practical implementation of `incR`.

39

40

41

42

43

44

45

46

47

48

49

50

## 51 **Introduction**

52 Incubation represents a crucial life stage for egg-laying vertebrates, of which birds are a  
53 paramount example. Fine control of incubation is essential and has deep ecological and  
54 evolutionary implications, notably for developing offspring but also for their parents  
55 (Conway and Martin 2000, Durant et al. 2013). For embryos, the thermal environment that  
56 the incubating individual provides is essential for successful development. Suboptimal  
57 incubation temperatures can lead to delayed embryonic growth (Hepp et al. 2006, Nord and  
58 Nilsson 2011), hormonal and immune changes (Ardia et al. 2010, DuRant et al. 2014), and  
59 long-term survival consequences (Berntsen and Bech 2016). However, incubating individuals  
60 need to divide their time budget between incubation and self-maintenance (e.g. foraging) and,  
61 therefore, they allocate time to each activity according to prevalent ecological conditions (e.g.  
62 ambient temperatures (Coe et al. 2015) or food availability (Londoño et al. 2008)). Despite a  
63 long standing scientific interest in incubation, we are still elucidating subtle ecological causes  
64 and consequences of variation in this behaviour (Durant et al. 2013, Smith et al. 2015, Bulla  
65 et al. 2016) which may have important practical implications, for example, in a context of  
66 global climate change (Griffith et al. 2016).

67 The study of avian incubation is nowadays fuelled by recent technological advances (see  
68 Smith et al. 2015). In particular, the use of iButtons® (Maxim Integrated) and probed  
69 Tinytags (Gemini Data Loggers) allows researchers to measure incubation temperature as  
70 frequently as every second for long periods of time with minimal disturbance. These  
71 technologies have the potential to expand the range of species and scientific questions that  
72 researchers can address. However, the amount of data collected is usually much larger than it  
73 was traditionally available and several analytical hurdles must be overcome.

74 Before answering biological questions about incubation patterns, the observer needs to  
75 summarise the data and effectively reduce them to a few variables that can be correlated with  
76 a set of predictors of interest. For example, number of incubation bouts and their duration are  
77 popular metrics in avian studies (Cooper and Voss 2013). The first software for the analysis  
78 of incubation temperatures was released more than 10 years ago: Rhythm (Cooper and Mills  
79 2005). The benefits of Rhythm were immediate as it allowed the automated differentiation  
80 between time periods when eggs were being incubated (Cooper and Voss 2013, Coe et al.  
81 2015). This software made fast and objective an otherwise time-consuming and subjective  
82 activity. However, in a time when incubation data collection is easier than ever before,  
83 Rhythm lacks much of the flexibility required for the handling of big data sets. Rhythm also  
84 has limited analytical and graphical capabilities, which are a desire when thousands of  
85 temperature records may be available. However, apart from Rhythm, no other specialised  
86 software is currently available to analyse incubation temperature data.

87 To overcome these difficulties, I have developed a new R package, `incR`. This package  
88 provides a suite of R functions that i) prepare and format a raw temperature time-series (via  
89 the `incRprep` and `incRenv` functions), ii) apply an automated algorithm to score  
90 incubation (`incRscan`), iii) plot the data (`incRplot`) and iv) calculate biologically  
91 relevant metrics of incubation (e.g. number of incubation bouts) (Figure 1). Users can apply  
92 the whole pipeline or use any of the components of `incR` separately. `incR` takes advantage  
93 of the flexibility in data handling and graphical capabilities offered by R. I first explain the  
94 workflow of `incR` and its automated algorithm to score incubation. Then, I use video-  
95 recordings of incubating blue (*Cyanistes caeruleus*) and great tit (*Parus major*) females along  
96 with incubation temperature data to validate the automated algorithm. I further show how  
97 `incR` can accurately calculate several metrics of incubation behaviour. Finally, I discuss the  
98 general application of this new method and its potential limitations. A stable version of the

99 package is available on CRAN (v 1.1.0) and a development version can be found on GitHub  
100 (v 1.1.0.9000. <https://github.com/PabloCapilla/incR>).

## 101 **incR workflow**

102 The method implemented in `incR` exploits variation in nest (incubation) and ambient  
103 temperature to calculate the presence or absence of an incubating individual in the nest.  
104 Ambient temperature data are ideally collected near the nesting site but can also be obtained  
105 from web-based sources if the latter is not available. Code and advice to replicate the  
106 analyses presented here can be found in Appendix 1 and 2, the package documentation  
107 (<https://cran.r-project.org/web/packages/incR/incR.pdf>) and in a package vignette (accessible  
108 in R via: `browseVignettes("incR")`). Additionally, `incR` is distributed with an  
109 example data set that can be explored to understand data structure and the use of each `incR`  
110 function. For details to install the package, visit: <https://github.com/PabloCapilla/incR>

111 *Data preparation:* `incRprep` and `incRenv`

112 To start working with `incR`, the user needs to have a file with temperature and time  
113 information for a single nest under study. This file should consist of at least two columns:  
114 date-time and temperature values. Once this initial file is prepared, the first step in the  
115 pipeline is performed by `incRprep`, which simply prepares the dataset for other pipeline  
116 components. Then, `incRenv` can be used to automatically assign environmental temperature  
117 to every incubation temperature observation, information required by `incRscan` to score  
118 incubation (Figure 1). `incR` is distributed with sample data and, therefore, the user can  
119 check the data structure needed to start the pipeline.

120 *Automated incubation scoring:* `incRscan`

121 The algorithm implemented by `incRscan` exploits changes in nest temperature that arise  
122 from the behaviour of the incubating adult considering the difference between incubation (i.e.

123 temperature in the nest cup) and environmental temperatures (see Table 1 for definitions of  
124 terms used throughout the paper).

125 Four possible situations broadly exist regarding the change in nest temperature after the  
126 incubating individual enters (on-bout) and leaves (off-bout) the nest. These four scenarios are  
127 classified as follows: 1) incubation off-bout when nest temperature is high (close to  
128 maximum incubation temperature); 2) incubation on-bout when nest temperature is high  
129 (close to maximum incubation temperature); 3) incubation off-bout when nest temperature is  
130 low (close to environmental temperature); 4) incubation on-bout when nest temperature is  
131 low (close to environmental temperature). See Figure S1 for a visual representation of these  
132 four scenarios. Cases 3 and 4 are especially sensitive to the assumption that environmental  
133 temperature is lower than maximum incubation temperature (see Results and Discussion).  
134 The change in nest temperature that is expected after an incubation on- / off-bout differs  
135 across the four scenarios.

136 Assuming that environmental temperature is normally lower than maximum incubation  
137 temperature, in scenario 1, when the incubating individual leaves the nest, a sharp drop in  
138 nest temperature is expected to follow (Off-bout(1) in Figure S1). At this point, any increase  
139 in nest temperature would mean that the bird has returned to the nest (scenario 2. On-bout(2)  
140 in Figure S1). If an off-bout occurs when nest temperature is close to the environmental  
141 temperature (scenario 3), the decrease in nest temperature after the event would be small  
142 (Off-bout(3) in Figure S1). When a long off-bout brings nest temperature close to the  
143 environmental one, an incubation on-bout would be reflected in a large increase in nest  
144 temperature (scenario 4. On-bout(4) in Figure S1).

145 These four scenarios represent simplified extremes in a spectrum of possible situations but  
146 they illustrate the general principle. To explain the analytical approach in more practical

147 terms, I here describe the analysis of one day of incubation (day 1), using the terminology  
148 employed in the R package (Table 1).

149

150 For every time point in the incubation time series, `incRscan` calculates the difference  
151 between nest and environmental temperatures. Then, these differences are compared against  
152 the value of `temp.diff.threshold` (Table 1), determining whether scenarios 1 and 2 or  
153 3 and 4 (see above) are applicable for a given time point. Two cases are possible: i) nest  
154 temperature is higher than environmental temperature by more than  
155 `temp.diff.threshold` degrees; or, ii) nest temperature is within  
156 `temp.diff.threshold` degrees of the environmental one.

157

158 Comparing the change in nest temperature between consecutive temperature recordings  
159 against temperature thresholds, `incRscan` determines whether the incubating individual is  
160 in the nest or an off-bout has occurred. Rather than having a fixed threshold for the entire  
161 analysis, a flexible threshold value is applied among days. Within days, the threshold to  
162 detect off-bouts can also change controlled by `temp.diff.threshold` and  
163 sensitivity (i.e. to accommodate changes in cooling rates between scenarios 1/2 and  
164 3/4 – see below). No threshold choice is required from the user but they are calculated by  
165 `incRscan` for each day of analysis. To accomplish this, the user needs to specify some  
166 period of the 24-hour cycle when an incubating bird can be assumed to be incubating eggs in  
167 its nest. This time window is controlled by the arguments `lower.time` and `upper.time`,  
168 representing the start and end of the time of day (for instance, for diurnal bird species this  
169 period can be set at night, when the incubating individual rests in the nest). Within this time  
170 window, the maximum decrease in nest temperature between pairs of consecutive points is  
171 calculated and set as a threshold for incubation off-bouts (hereafter, `maxDrop`) for scenario

172 1. Assuming that nest temperatures are above environmental values, `maxDrop` is thought to  
173 effectively represent the maximum drop in temperature associated with periods when the  
174 incubating individual is in the nest. The threshold for incubation off-bout in situation 3 must  
175 be lower than in scenario 1 (i.e. when nest temperature is close to environmental  
176 temperature); thus, the argument `sensitivity`, that must be specified by the user (taking  
177 values from 0 to 1), allows for such reduction, setting the off-bout threshold in scenario 3 as  
178 `maxDrop × sensitivity`. Similarly, `maxIncrease` is defined as the maximum  
179 increase in temperature between pairs of consecutive points within the `lower.time -`  
180 `upper.time` window and is set as a threshold for incubation on-bouts in scenario 4. Any  
181 increase in nest temperature in scenario 2 would mean an incubation on-bout. Note that  
182 `maxDrop` and `maxIncrease` do not need to be chosen by the user but are calculated by  
183 `incrscan` for every day of analysis and reported in an R object named  
184 `incrscan_threshold`. See Appendix 1 and 2 for a practical example.

185 Once these thresholds are set, temperature differences between successive pairs of data points  
186 throughout the day and between `upper.time` and `lower.time` are calculated. These  
187 values are sequentially compared with the value of `maxDrop` and `maxIncrease`,  
188 following a set of conditions:

189 For scenario 1 and 2,

$$190 T_i - T_{i-1} < \text{maxDrop (A)}; T_i - T_{i-1} > 0 \text{ (B)}.$$

191 For scenario 3 and 4,

$$192 T_i - T_{i-1} < \text{maxDrop} \times \text{sensitivity (C)}; T_i - T_{i-1} > \text{maxIncrease (D)}.$$

193  $T_i - T_{i-1}$  being the  $i^{\text{th}}$  and  $i-1^{\text{th}}$  temperature recordings from  $i=2$  to  $i=I$  ( $I$  being equal to the  
194 total number of daily data points evaluated). Off-bout periods are, then, defined between  $T_i$ 's



195 satisfying A or C and the closest subsequent situation in which  $T_j$ , when  $i < j$ , satisfies B or D.

196 On-bout periods start after an off-bout finishes and last until A or C is fulfilled again.

197

198 This algorithm can be sensitive to highly variable temperatures or marked drops in  
199 temperature within the `lower.time` - `upper.time` window. To make `incRscan`  
200 conservative and robust against these two potential sources of error, whenever  
201 `|maxDrop| > maxNightVariation` is fulfilled for a particular day of study, the value of  
202 `maxDrop` and `maxIncrease` of the previous day of incubation is instead used.  
203 `maxNightVariation` represents the maximum drop in temperature allowed in a period of  
204 constant incubation (i.e. within the `lower.time` - `upper.time` window). When this  
205 value is set too high, real off-bouts will be missed by `incRscan`.

206

207 The result of this algorithm is a temporal sequence of 0's and 1's representing on-bouts (1's)  
208 and off-bouts (0's). Using these sequences, other functions within `incR` can be used to infer  
209 incubation behaviour.

210 *Additional functions to visualise nest temperatures and extract biological metrics of*  
211 *incubation*

212 Regardless of whether or not `incRscan` has been used to score incubation, the `incR`  
213 package offers a suite of functions that can be applied to any binary time-series representing  
214 incubation. The current package version (1.1.0) allows the user to visualise the results of  
215 `incRscan` (`incRplot` generates a plot similar to graph 3 in Figure 1 and Figure S1),  
216 calculate onset and offset of daily activity (`incRact`), percentage of daily time spent in the  
217 nest (`incRatt`), number and average duration of on/off-bouts per day as well as individual  
218 off-bout duration and timing (`incRbouts`) and nest temperature mean and variance for a  
219 customised time window (`incRt`). The implementation of these functions is straightforward

220 as they only require a variable with binary data for on and off-bouts. These data are provided  
221 by `incRscan` under the column name `incR_score`. The function argument  
222 `incubation.vector` in `incRact`, `incRatt`, `incRbout` and `incRt` allows the user  
223 to manually specify the name of the column with binary data for incubation scores (see  
224 Appendix 2 and package documentation in R).

225

## 226 **Validation of `incR` using temperature and video-recording data**

227 To show the potential of this approach to yield meaningful metrics of incubation, I assessed  
228 the performance of the core functions in `incR`. First, I carried out a sensitivity analysis in  
229 which I evaluated the accuracy of `incRscan` over different values of its main arguments. I  
230 then chose the optimal values for these arguments and showed that the combination of  
231 `incRscan` and other `incR` functions can yield accurate measures of incubation behaviour. I  
232 applied the whole pipeline to incubation temperatures collected using iButton® devices. For  
233 the same incubation events, I used video footage of these nests to visually score incubation  
234 and then compared these results to the automatic algorithm implemented in `incRscan`.

### 235 *Field protocol and incubation data collection*

236 Incubation temperatures were recorded during 2015 and 2016 using iButton® devices in two  
237 blue tit and six great tit clutches. Blue tit data came from an urban and suburban population  
238 in Glasgow city ( $n = 2$  clutches;  $55^{\circ} 52.18'N$   $4^{\circ} 17.22'W$  and  $55^{\circ} 9'N$   $4^{\circ} 31'W$ ) (Pollock et al.  
239 2017), whereas great tit incubation data were recorded in an oak forest at the Scottish Centre  
240 for Ecology and the Natural Environment ( $n = 2$  clutches; SCENE,  $56^{\circ} 7.73'N$   $4^{\circ} 36.79'W$ )  
241 (Pollock et al. 2017) and in a mixed forest (dominated by oak, birch and pine trees) near the  
242 Netherlands Institute for Ecology (NIOO) ( $n = 4$ ;  $\sim 52^{\circ} 7' N$   $6^{\circ} 59' E$ ) (Spoelstra et al. 2015).  
243 Each iButtons® was wrapped in a piece of black cloth and placed in the nest cup, above the  
244 lining materials and among the eggs. Nest temperatures were recorded by iButtons® every 2

245 or 3 minutes. Video cameras inside the nest-boxes were used to monitor individual females  
246 and visually score incubation (see Pollock et al. 2017 for a general explanation about video  
247 camera deployment). In total, 12 days of incubation were completely or partially monitored  
248 using both iButtons® and recording cameras. Environmental temperatures for the same period  
249 in Scotland were recorded using iButtons® placed outside nest-boxes. For the Dutch clutches,  
250 environmental temperatures from a weather station approximately 18 Km away from the  
251 nest-box population were used. Data from the iButtons® were downloaded in the field using  
252 portable devices and a single file per nest was compiled in preparation to use `incR`.

### 253 *Data analysis*

254 Using video footage, I determined whether or not the incubating female had been present in  
255 the nest at every iButton® temperature time point. After preparing incubation temperature  
256 data using `incRprep` and `incRenv`, I applied `incRscan` to score incubation and  
257 compared its results to the footage-based scoring. I tested the performance of `incRscan` to  
258 changing values of its three key arguments, i) `maxNightVariation` (testing values from  
259 0.5 to 10 every 0.5), ii) `sensitivity` (from 0 to 1 every 0.1) and iii)  
260 `temp.diff.threshold` (from 0.5 to 10 every 0.5) (see Table 1 for definitions). When  
261 testing one argument, the others were kept to default values of 1.5, 0.15 and 3 for  
262 `maxNightVariation`, `sensitivity` and `temp.diff` respectively. This approach  
263 assumes that there are no interacting effects between parameter values. However, as a  
264 preliminary step in the analysis, I confirmed that that was the case. Therefore, I present here a  
265 1-dimensional grid search (i.e. varying values of one parameter while keeping the others  
266 fixed to a given value).  
267 `lower.time` and `upper.time` were always fixed to 10 p.m. and 3 a.m (night time). For  
268 every test, I calculated the percentage of correctly scored incubation time points. After  
269 selecting the best-performing combination of argument values (i.e. highest percentage of

270 agreement between `incRscan` and video footage), I compared daily incubation attendance  
271 (i.e. percentage of time spent in the nest), number of daily off-bouts and mean daily off-bout  
272 duration between `incRscan`-based and video footage-based incubation scores. I present  
273 Pearson's correlations coefficients between the two metrics. `incR` functions, statistical tests  
274 and graphical illustrations (apart from the left-hand side of Figure 1) were produced in R  
275 version 3.4.4 (R Core Team 2018). Detailed practical guidelines to use `incR` and reproduce  
276 the validation shown in this manuscript can be found in Appendix 1 and 2 as well as in the  
277 package's vignette (accessible in R via: `browseVignettes("incR")`).

278

## 279 **Results and Discussion**

280 Within nest-boxes, changing values of `maxNightVariation` did not affect the  
281 performance of `incRscan`. Similar results were found for `sensitivity` and  
282 `temp.diff.threshold`, with only analysis of data from one nest-box being markedly  
283 affected by changes in these arguments (Figure S2A-C). It is important to note that when  
284 `maxNightVariation` is set to a very low value (effectively not allowing for much  
285 temperature variation in the `lower.time` - `upper.time` time window) `incRscan`  
286 fails to yield any result as no temperature threshold would be available. This result can be  
287 seen in Figure S1A: when evaluating `maxNightVariation` equal to 0.5°C, data from  
288 only two out of eight nest-boxes were extracted by `incRscan`.

289 Consistent variation in `incRscan` best-performing argument values was found among nest-  
290 boxes (Figure 2), suggesting that differences in, for example, `iButtons`® deployment may be  
291 affecting the accuracy of the `incRscan` algorithm. This potential effect has been  
292 qualitatively suggested before (Smith et al. 2015) and highlights the importance of collecting  
293 high quality data in the field. However, the percentage of agreement was always high (> 80%,

294 Figure 2). Highly consistent results were found within nest-boxes with marked among-box  
295 variation with only one exception (nest-box G178\_GT, Figure 2) in which setting  
296 `maxNightVariation` to 4°C improved the percentage of agreement compared to that  
297 found with the default value (3 °C). The general pattern across the eight nest-boxes is that  
298 values above 1.5°C for `maxNightVariation` give the highest accuracy (90.27%. Figure  
299 S1D). Similarly, values below 0.3 for `sensitivity` (90.27%) and a  
300 `temp.diff.threshold` value of 4°C (91.16%) were found to be the most accurate  
301 argument choices (Figure S2E-F).

302

303 Given these results, I set the parameters to their overall optimal values of 1.5°C, 0.25 and 4°C  
304 for `maxNightVariation`, `sensitivity` and `temp.diff.threshold`  
305 respectively, yielding a percentage of agreement across nest-boxes of 91.16% (maximum =  
306 98.56%; minimum = 80.42). With these argument values, attendance calculated based on  
307 video footage and inferred by `incRscan` showed a Pearson's correlation coefficient of  
308 0.992 ( $t = 24.81$ ,  $p < 0.0001$ , 95% confidence interval = 0.971-0.998. Figure 3A). Likewise,  
309 the algorithm in `incRscan` was able to provide accurate off-bout information (Figure 3B &  
310 3C). `incR`-estimated off-bout number and mean daily off-bout duration were highly  
311 correlated with real off-bout number and duration as extracted from video footage (for off-  
312 bout number:  $r = 0.972$ ,  $t_{10} = 13.04$ ,  $p < 0.0001$ , 95% confidence interval = 0.900-0.992; for  
313 daily mean off-bout duration:  $r = 0.996$ ,  $t_{10} = 34.69$ ,  $p < 0.0001$ , 95% confidence interval =  
314 0.985-0.999).

315

316 These results show that the method presented here can yield accurate metrics of incubation  
317 behaviour. Based on the validation of Rhythm presented in Bueno-Enciso et al. (2017), `incR`  
318 performs better than that software and yields higher correlations between video and `iButton`®

319 data (Bueno-Enciso et al. 2017); however, note the possible influence of different  
320 environmental temperatures across studies. In this study the difference between nest  
321 temperatures and ambient temperatures ranged from a minimum of -0.98 (i.e. ambient  
322 temperature 0.98 degrees higher than nest temperature) to a maximum of 32.49, with a mean  
323 value across nest-boxes of 20.34°C (standard deviation = 5.18) (Table S1). For number of  
324 off-bouts, the discrepancies between `incR` and video footage seem to arise from `incR`  
325 slightly over-estimating the number of off-bouts (Figure 3B). This effect was mainly caused  
326 by data from two nest-boxes (G178\_GT and GT173\_GT) which were collected in the same  
327 year and location. However, the magnitude of this discrepancy was small (six off-bouts of  
328 maximum differences between estimates for whole days; estimated regression slope  $\pm$  SE =  
329  $0.926 \pm 0.071$ ) and the magnitude and direction of this error is unlikely to differentially affect  
330 comparisons across groups of nests (e.g. experimental *versus* control in an experimental  
331 setup). Additional metrics to those presented here can be calculated using `incR` (Figure 1  
332 and see package documentation), for which high reliability is expected given the results of  
333 this validation.

334

### 335 **Benefits of `incR`**

336 The benefits of `incR` are multiple. It represents a quantitative improvement over other  
337 methods. The results of the validation suggest that `incR` may perform better than other  
338 approaches (see validation of Rhythm in Bueno-Enciso et al. 2017). No assumptions about  
339 minimum off-bout time or off-bout temperature reductions are needed and the assessment of  
340 different parameter values for `incR_scan` is straightforward (see Appendix 1 and 2).  
341 `incRscan` uses changes between consecutive temperature points, rather than total  
342 temperature reduction during an off-bout, making the detection of short off-bouts possible.  
343 Furthermore, the inclusion of data on environmental temperatures informs the analysis,

344 allowing for off-bout detection when nest and environmental temperatures are similar. In  
345 Appendix 1 and 2, I offer detailed instructions to reproduce the analysis presented here. More  
346 generally, using a script-based approach will improve repeatability and will ease  
347 collaboration. `incR` embraces the philosophy of the R project: it is completely free and is in  
348 constant improvement. Further developments in the method to score incubation could be  
349 embedded in or used jointly with `incR` to extract metrics of incubation.

350

### 351 **Limitations**

352 The capability of `incR`, or very likely of any other analytical tool to study incubation  
353 temperatures, to yield accurate results will certainly correlate with data quality. Optimal  
354 placement of the logging device among the eggs (i.e. close to the incubating adult and not  
355 buried inside nest materials) and data validation are, therefore, crucial. Two key assumptions  
356 underlie the use of `incRscan`. First, the incubating individual is assumed to rest in the nest  
357 in the `lower.time` - `upper.time` time window. This assumption holds for most  
358 species in temperate and tropical zones, for which activity outside the nest is paused during  
359 night time (a reversed pattern is expected in nocturnal species). However, careful  
360 consideration of this assumption will be needed when the species of interest do not have a  
361 rhythmic incubation pattern or rhythms differ from 24 h (Bulla et al. 2016). Secondly, the  
362 accuracy of `incRscan` will also depend on the difference between maximum incubation  
363 temperature and environmental temperature. Small differences between them will lead to  
364 subtle temperature changes after the incubating individual enters and leaves the nest,  
365 affecting the detectability of such events. The validation presented here encompasses a wide  
366 range of values for the difference between nest and environmental temperatures (Table S1)  
367 but further tests would need to be carried out to evaluate the accuracy of `incR` in hot  
368 environments. Under these conditions, apart from maximising the percentage of agreement

369 between `incRscan` incubation scores and the data set for validation, researchers should pay  
370 careful attention to maximise agreement in other incubation metrics of such as number of  
371 incubation off-bouts. Comparing the performance of `incRscan` for data collected on the  
372 same species at different latitudes (and thus with likely large or small differences between  
373 environmental and nest temperatures) might provide valuable information on the general  
374 applicability of `incRscan`.

375

## 376 **Conclusions**

377 We have developed a method that accurately extracts behavioural and temperature  
378 information from series of incubation temperature recordings. This method can potentially be  
379 used to study incubation in a broad range of species and ecological contexts and, therefore,  
380 assist the wide community of researchers studying incubation in the wild. For different  
381 species and environments, validation will be needed but we also provide detailed practical  
382 advice to carry out such validation. In order to aid its application, two appendices show in  
383 detail how researchers can easily adapt and calibrate this method to their data.

384

## 385 **Acknowledgements**

386 Barbara Helm and Davide Dominoni offered the inspiration to write this manuscript: without  
387 their support and guidance none of this work would have been possible. Robyn Womack and  
388 Natalie van Dis very kindly let me use their great tit data from Glasgow and The Netherlands.  
389 They also tested the package in multiple occasions and provided thorough technical advice.  
390 Field data collection was significantly eased by the help of Davide Dominoni, Barbara Helm,  
391 Chris Pollock, Jessica Clark and Paul Jerem, along with many other volunteers. Many people  
392 at the Institute of Biodiversity, Animal Health and Comparative Medicine of the University  
393 of Glasgow provided very valuable advice; in particular, I thank Jason Matthiopoulos. I also



394 thank Barbara Helm, Davide Dominoni, Natalie van Dis, Natalia Bravo-Santano, Andreas  
395 Nord, Caren Cooper, Wesley Hochachka and two anonymous reviewers for providing very  
396 valuable comments on an earlier draft of this manuscript.

397

## 398 **Funding**

399 This work was supported by a postgraduate scholarship from Iberdrola Foundation and by the  
400 Biotechnology and Biological Sciences Research Council-funded South West Biosciences  
401 Doctoral Training Partnership (BB/M009122/1).

## 402 **Conflicts of interest**

403 PC-L declares no conflict of interest.

404

## 405 **References**

- 406 Ardia, D. R., Pérez, J. H. and Clotfelter, E. D. 2010. Experimental cooling during incubation  
407 leads to reduced innate immunity and body condition in nestling tree swallows. - Proc.  
408 R. Soc. B 277: 1881–1888.
- 409 Berntsen, H. H. and Bech, C. 2016. Incubation temperature influences survival in a small  
410 passerine bird. - J. Avian Biol.: 141–145.
- 411 Bueno-Enciso, J., Barrientos, R. and Sanz, J. J. 2017. Incubation Behaviour of Blue *Cyanistes*  
412 *caeruleus* and Great Tits *Parus major* in a Mediterranean Habitat. - Acta Ornithol. 52:  
413 21–34.
- 414 Bulla, M., Valcu, M., Dokter, A. M., Dondua, A. G., Kosztolányi, A., Rutten, A., Helm, B.,  
415 Sandercock, B. K., Casler, B., Ens, B. J., Spiegel, C. S., Hassell, C. J., Küpper, C.,  
416 Minton, C., Burgas, D., Lank, D. B., David, C., Loktionov, E. Y., Nol, E., Kwon, E.,

- 417 Smith, F., Gates, H. R., Vitnerová, H., Prüter, H., James, A., Clair, J. J. H. S., Lamarre,  
418 J., Rausch, J., Reneerkens, J., Conklin, J. R., Burger, J., Bêty, J., Coleman, J. T.,  
419 Figuerola, J., Hooijmeijer, J. C. E. W., Alves, J. A., Smith, J. A. M., Koivula, K.,  
420 Gosbell, K., Exo, K., Niles, L., Koloski, L., Mckinnon, L., Praus, L., Giroux, M.,  
421 Sládeček, M., Boldenow, M. L., Goldstein, M. I., Šálek, M., Senner, N., Rönkä, N.,  
422 Lecomte, N., Gilg, O., Vincze, O., Johnson, O. W., Smith, P. A., Woodard, P. F., Pavel,  
423 S., Battley, P. F., Bentzen, R., Lanctot, R. B., Porter, R., Saalfeld, S. T., Freeman, S.,  
424 Brown, S. C., Yezerinac, S., Székely, T., Montalvo, T., Piersma, T., Loverti, V.,  
425 Pakanen, V., Tijssen, W. and Kempnaers, B. 2016. Unexpected diversity in socially  
426 synchronized rhythms of shorebirds. - *Nature* 540: 109–113.
- 427 Coe, B. H., Beck, M. L., Chin, S. Y., Jachowski, C. M. B. and Hopkins, W. A. 2015. Local  
428 variation in weather conditions influences incubation behavior and temperature in a  
429 passerine bird. - *J. Avian Biol.* 46: 1–10.
- 430 Conway, C. J. and Martin, T. E. 2000. Evolution of passerine incubation behavior: influence  
431 of food, temperature, and nest predation. - *Evolution* (N. Y). 54: 670–685.
- 432 Cooper, C. and Mills, H. 2005. New software for quantifying incubation behavior from time-  
433 series recordings. - *J. F. Ornithol.* 76: 352–356.
- 434 Cooper, C. B. and Voss, M. A. 2013. Avian Incubation Patterns Reflect Temporal Changes in  
435 Developing Clutches. - *PLoS One* 8: e65521.
- 436 Durant, S. E., Hopkins, W. A., Hepp, G. R. and Walters, J. R. 2013. Ecological, evolutionary,  
437 and conservation implications of incubation temperature-dependent phenotypes in birds.  
438 - *Biol. Rev.* 88: 499–509.
- 439 DuRant, S. E., Carter, A. W., Denver, R. J., Hepp, G. R. and Hopkins, W. A. 2014. Are  
440 thyroid hormones mediators of incubation temperature-induced phenotypes in birds? -

- 441 Biol. Lett. 10: 20130950.
- 442 Griffith, S. C., Mainwaring, M. C., Sorato, E. and Beckmann, C. 2016. High atmospheric  
443 temperatures and “ ambient incubation ” drive embryonic development and lead to  
444 earlier hatching in a passerine bird. - R. Soc. Open Sci. 3: 150371.
- 445 Hepp, G. R., Kennamer, R. A. and Johnson, M. H. 2006. Maternal effects in Wood Ducks:  
446 Incubation temperature influences incubation period and neonate phenotype. - *Funct.*  
447 *Ecol.* 20: 307–314.
- 448 Londoño, G. A., Levey, D. J. and Robinson, S. K. 2008. Effects of temperature and food on  
449 incubation behaviour of the northern mockingbird, *Mimus polyglottos*. - *Anim. Behav.*  
450 76: 669–677.
- 451 Nord, A. and Nilsson, J.-Å. 2011. Incubation temperature affects growth and energy  
452 metabolism in blue tit nestlings. - *Am. Nat.* 178: 639–51.
- 453 Pollock, C., Capilla-Lasheras, P., McGill, R. A. R., Helm, B. and Dominoni, D. M. 2017.  
454 Integrated behavioural and stable isotope data reveal altered diet linked to low breeding  
455 success in urban-dwelling blue tits (*Cyanistes caeruleus*). - *Sci. Rep.* 7: 5014.
- 456 R Core Team 2018. R: A Language and Environment for Statistical Computing. in press.
- 457 Smith, J. A., Cooper, C. B. and Reynolds, S. J. 2015. Advances in techniques to study  
458 incubation. - In: Deeming, D. C. and Reynolds, S. J. (eds), *Nests, Eggs, and Incubation:*  
459 *New ideas about avian reproduction.* Oxford University Press, pp. 312.
- 460 Spoelstra, K., van Grunsven, R. H. A., Donners, M., Gienapp, P., Huigens, M. E., Slaterus,  
461 R., Berendse, F., Visser, M. E. and Veenendaal, E. 2015. Experimental illumination of  
462 natural habitat--an experimental set-up to assess the direct and indirect ecological  
463 consequences of artificial light of different spectral composition. - *Philos. Trans. R. Soc.*

464 B 370: 20140129.

465

466

467

468

469

470

471

472

473

474

475

476

477

478

479

480

481

482

483

484

## 485 **Figure Captions**

486 **Figure 1.** `incR` workflow and visualisation of corresponding analysis of nest temperature  
487 data at each step of the workflow. After the user collates information from a single nest,  
488 `incR` can be used. `incRprep` prepares raw data time series for the pipeline (1) and  
489 `incRenv` adds environmental temperatures to the initial data table (shown as green lines in  
490 the plot 2). `incRscan` classifies data points into absence (purple) or presence (light red) of  
491 the incubating individual in the nest (3). From a sequence of 0's and 1's calculated by  
492 `incRscan`, `incRbouts`, `incRatt`, `incRact` and `incRt` extract information about  
493 on/off-bouts, nest attendance, start and end of activity and averaged nest temperatures for  
494 customised time windows. `incRplot` can be used to visualise the results of `incRscan`  
495 and produce the graph shown in panel 3.

496

497 **Figure 2.** Percentage of agreement between `incRscan` and video-footage across eight  
498 different nest-boxes. Colour codes represent individual nest-boxes and each point within nest-  
499 box illustrates the percentage of agreement for each of the three 1-dimensional grid searches,  
500 after the best values were selected for `maxNightVariation`, `sensitivity` and  
501 `temp.diff.threshold`. Consistent results are found within nest-boxes with one  
502 exception (G178\_GT) in which setting `maxNightVariation` to 4°C improved the  
503 percentage of agreement compared to that of the default value. Points are slightly offset in the  
504 x axis to aid visualisation of overlaying points.

505

506 **Figure 3.** Correlations between video-footage and `incR` estimates of incubation attendance  
507 (percentage of daily time spent in the nest (A), number of daily off-bouts (B) and daily mean  
508 off-bout duration in minutes (C). Colour codes represent individual nest-boxes and each point  
509 illustrates one day of incubation. Dashed black line was drawn following an intercept of 0  
510 and a slope of 1.

511

512

513

514

515

516

517

518

519

520

521

522

523

524 **Tables**

525 **Table 1.** Glossary of terms used in this manuscript.

| Term                                       | Type                              | Description                                                                                                                                                                                  | Chosen by the user?                     |
|--------------------------------------------|-----------------------------------|----------------------------------------------------------------------------------------------------------------------------------------------------------------------------------------------|-----------------------------------------|
| Incubation temperature or nest temperature | -                                 | Temperature inside the nest cup at any given time point. By this term I refer to a variable value that depends on whether, and for how long, the incubating individual is in or out the nest | -                                       |
| Environmental temperature                  | -                                 | Air temperature outside nest                                                                                                                                                                 | -                                       |
| incR_scan                                  | R function                        | Calculates presence or absence of the incubating individual in the nest based on nest and ambient temperature variation                                                                      | -                                       |
| temp.diff.threshold                        | incR_scan argument                | Difference allowed between nest and environmental temperatures                                                                                                                               | Yes                                     |
| lower.time                                 | incR_scan argument                | Start of a time window when the incubating individual is assumed to be in the nest                                                                                                           | Yes                                     |
| upper.time                                 | incR_scan argument                | End of a time window when the incubating individual is assumed to be in the nest                                                                                                             | Yes                                     |
| sensitivity                                | incR_scan argument                | Reduction in off-bout threshold when nest temperature is close to environmental temperature                                                                                                  | Yes                                     |
| maxNightVariation                          | incR_scan argument                | Maximum variation allowed in the lower.time – upper.time window. It controls for big drops in temperature within this temporal window (i.e. night-time incubation off-bouts)                 | Yes                                     |
| maxDrop                                    | Internal calculation in incR_scan | Maximum drop in temperature between two consecutive time points within the lower.time – upper.time window                                                                                    | No. Calculated and reported by incRscan |
| maxIncrease                                | Internal calculation in incR_scan | Maximum increase in temperature between two consecutive time points within the lower.time – upper.time window                                                                                | No. Calculated and reported by incRscan |

526

# Agreement incRscan - video recordings

0.95  
0.90  
0.85  
0.80

G16\_BT

G173\_GT

G178\_GT

G22\_BT

NL1\_GT

NL14\_GT

NL62\_GT

NL74\_GT

Nest-box

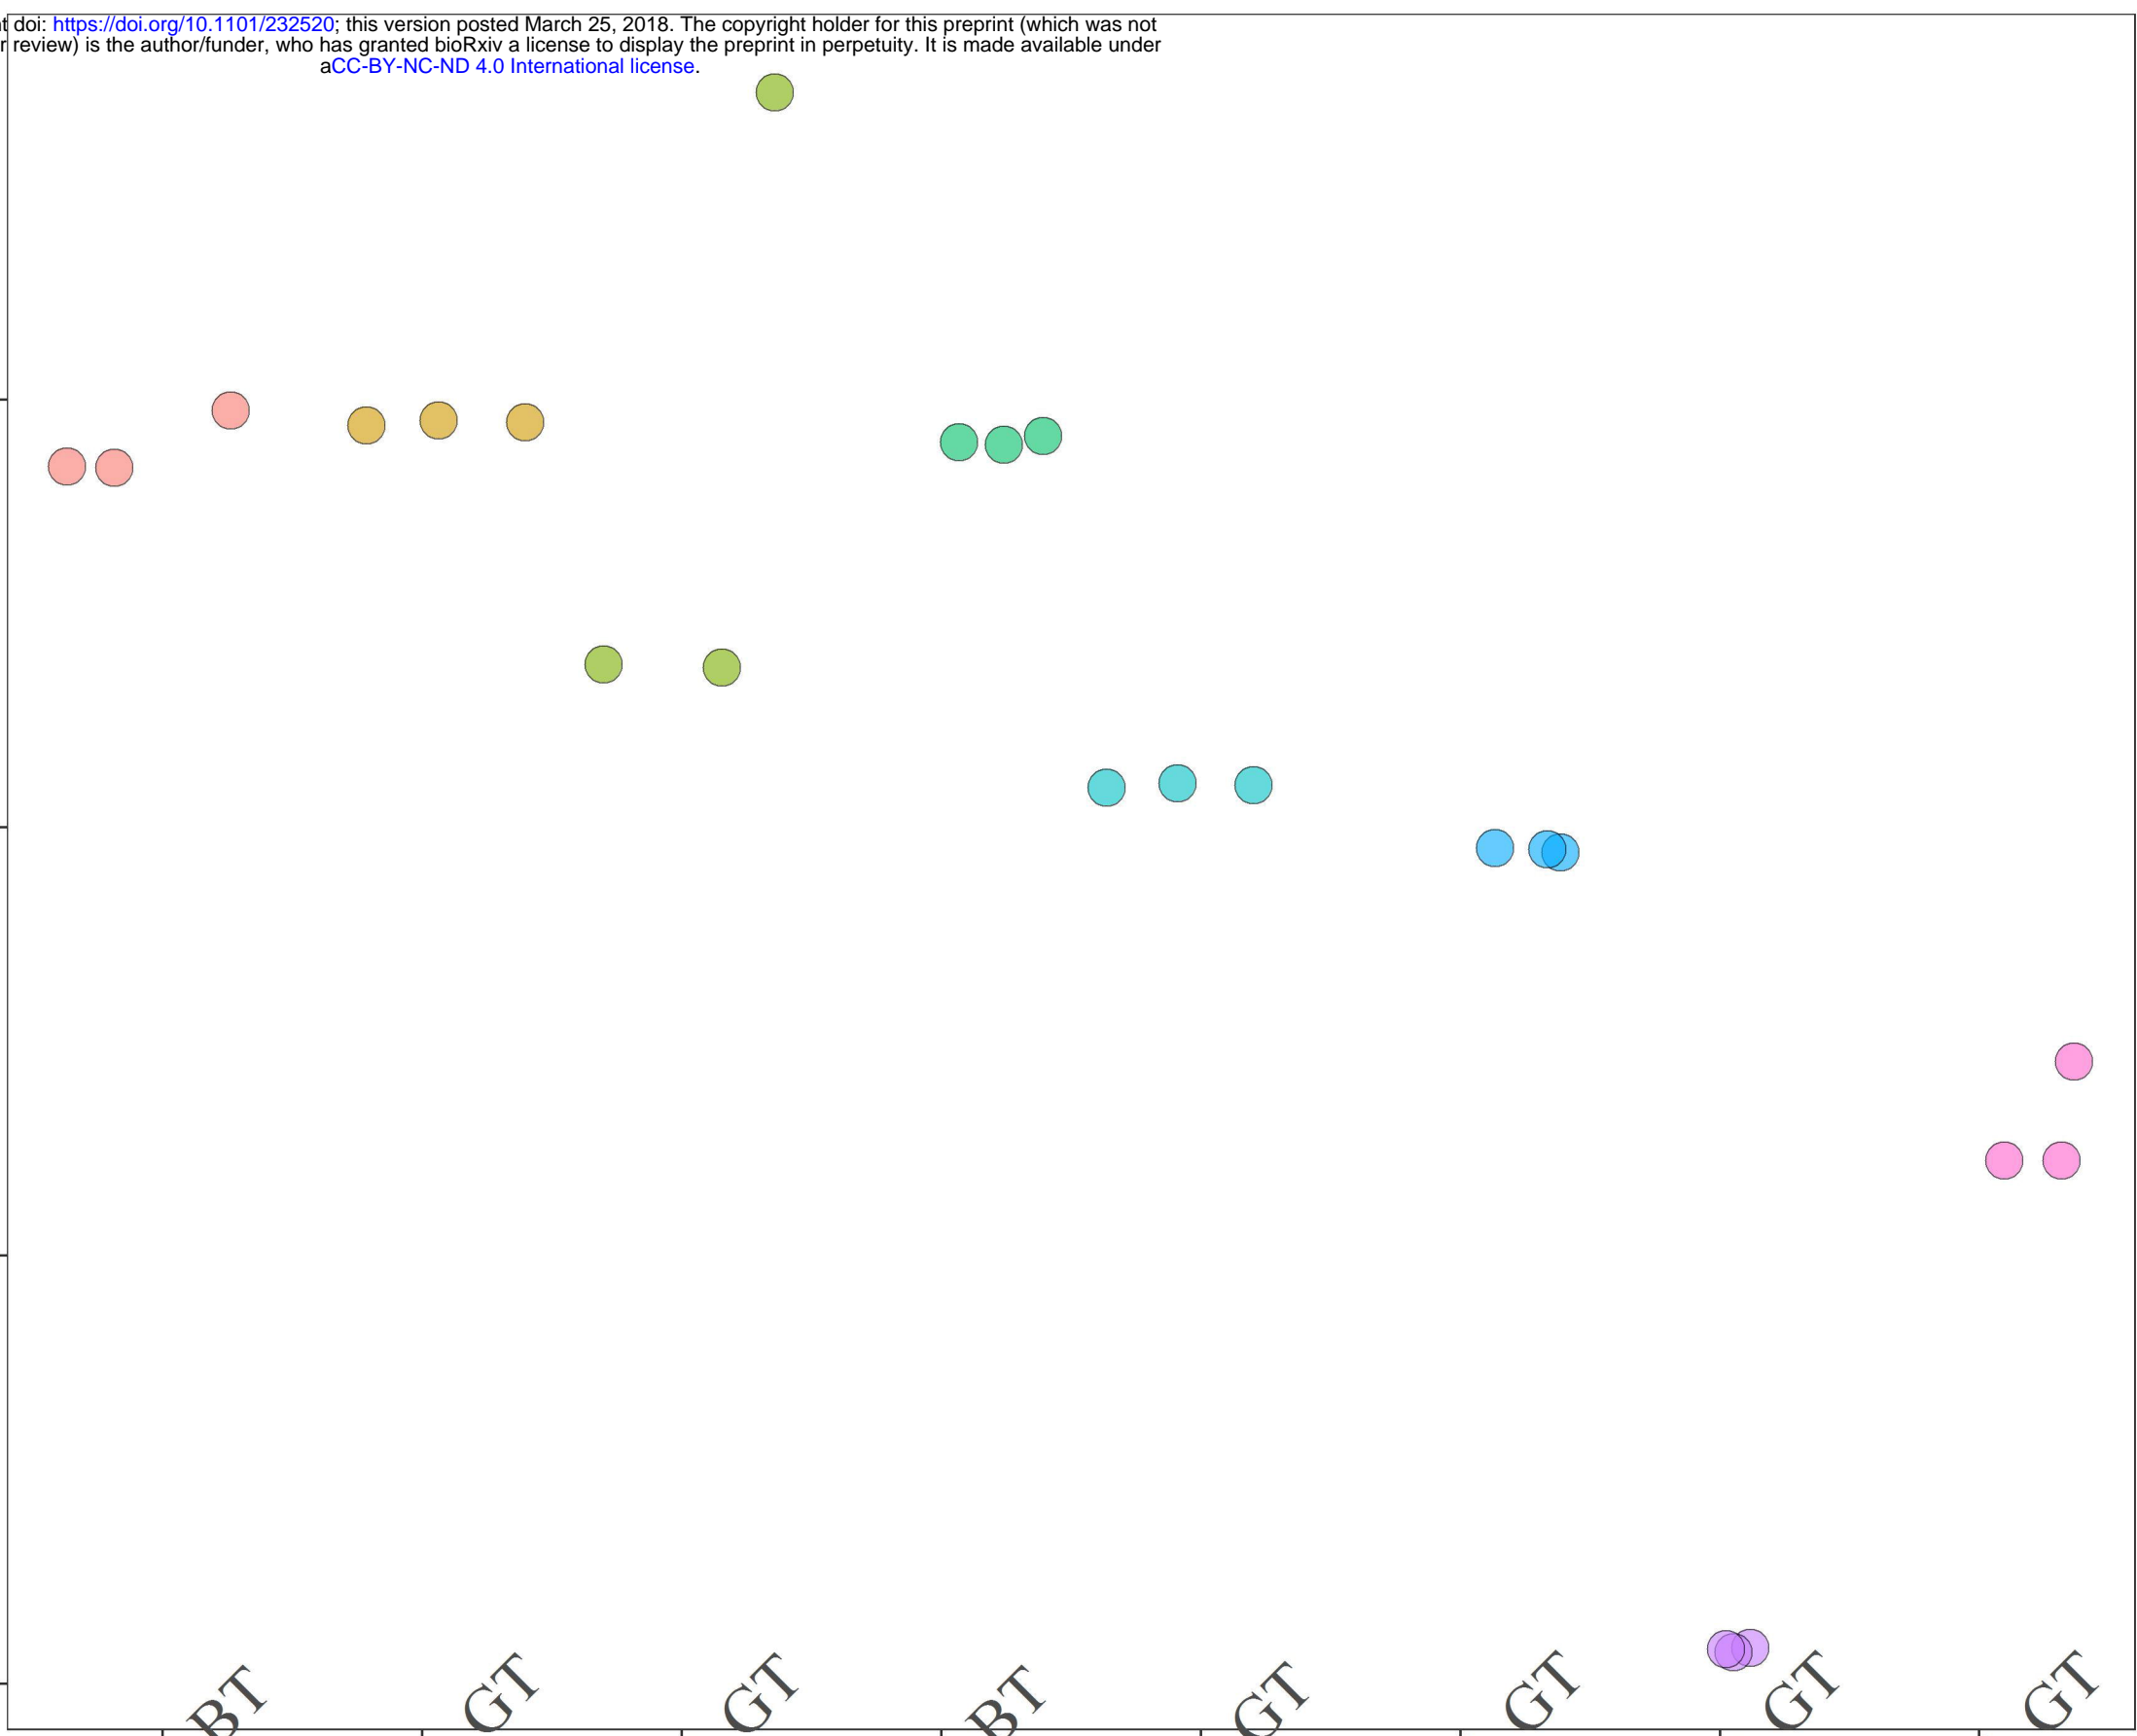

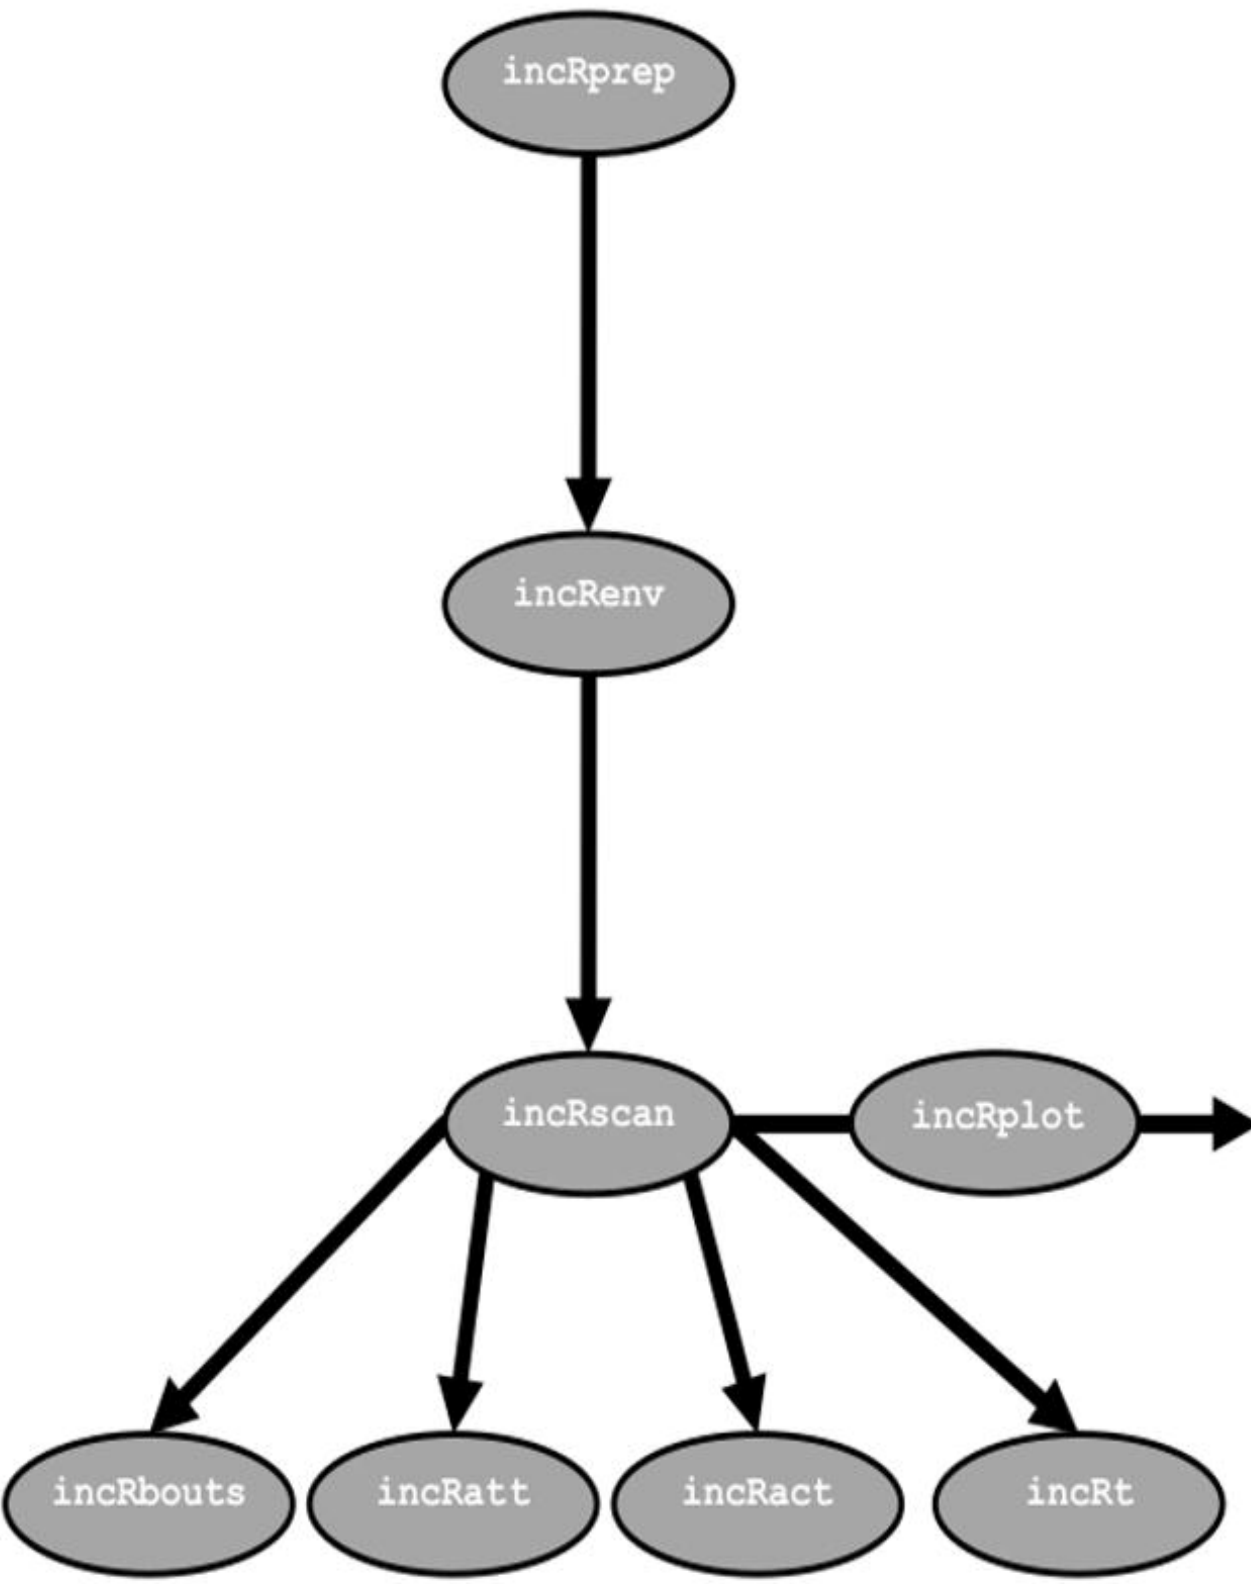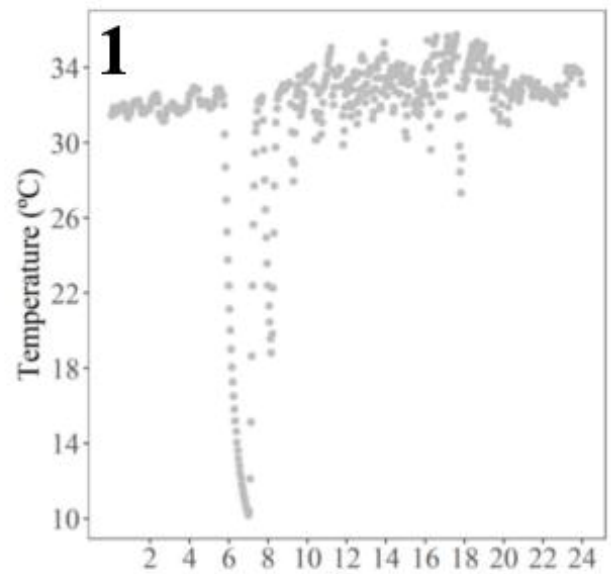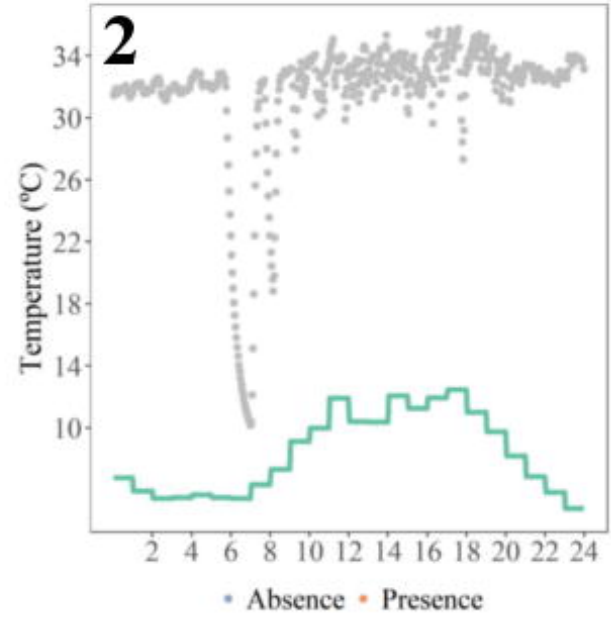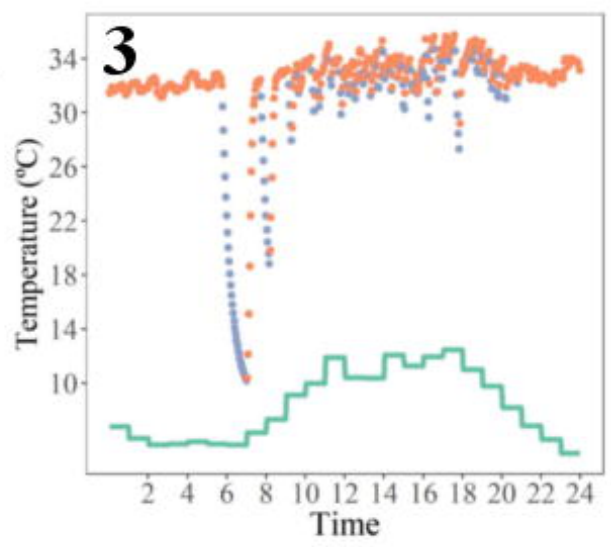



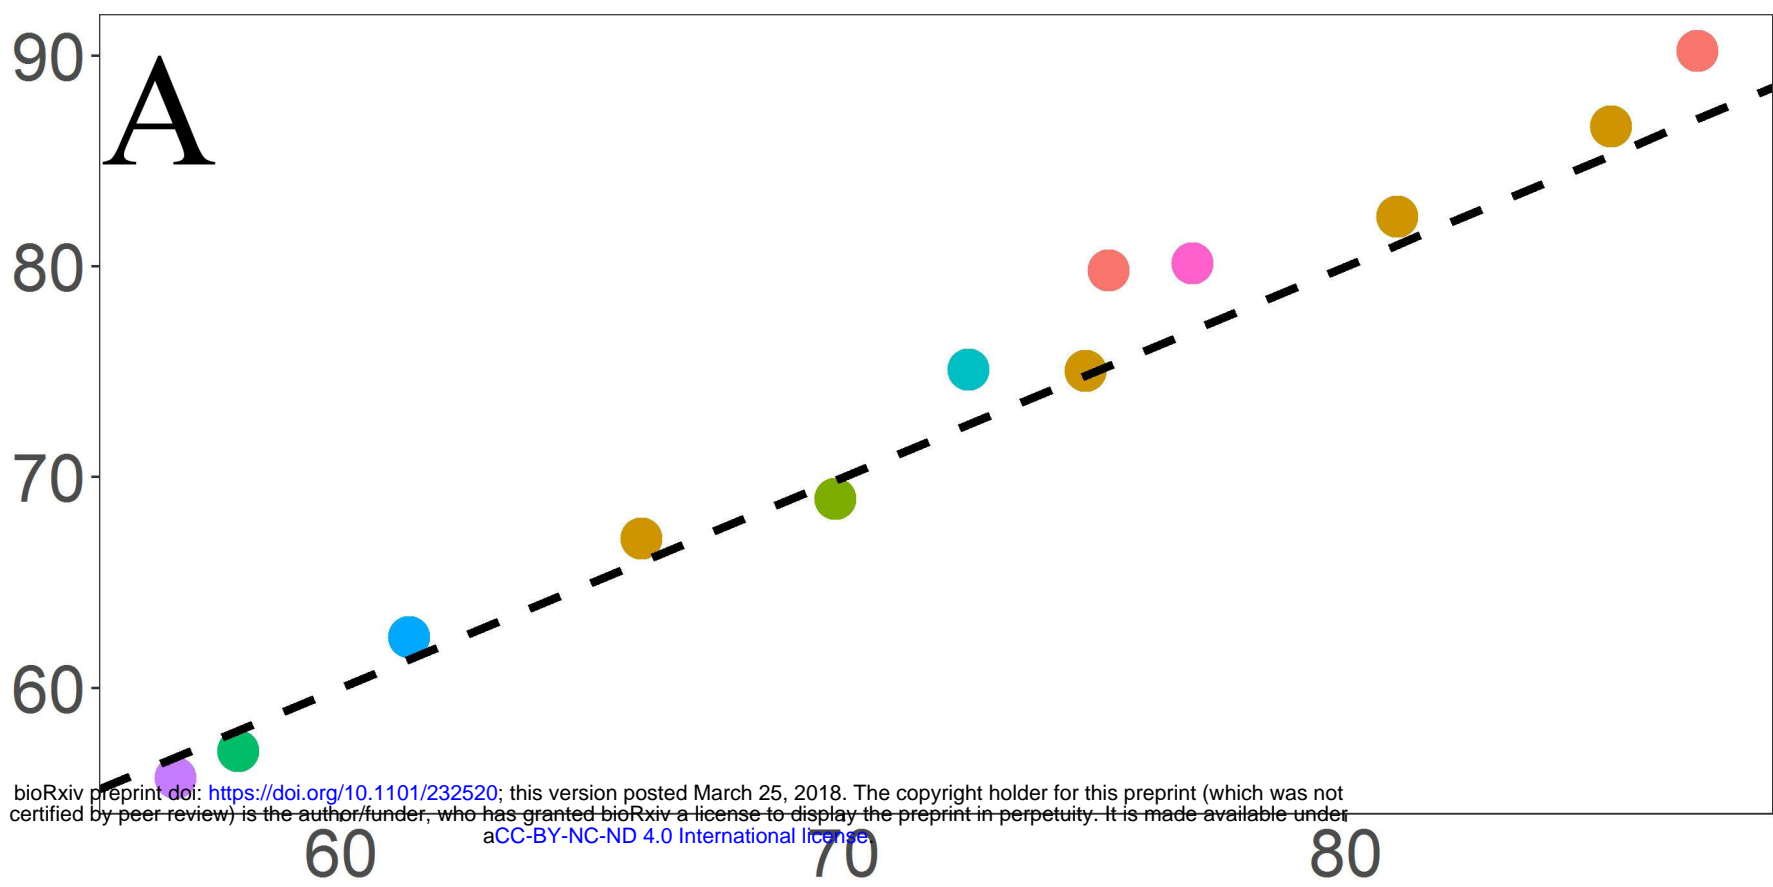

Video-footage estimate

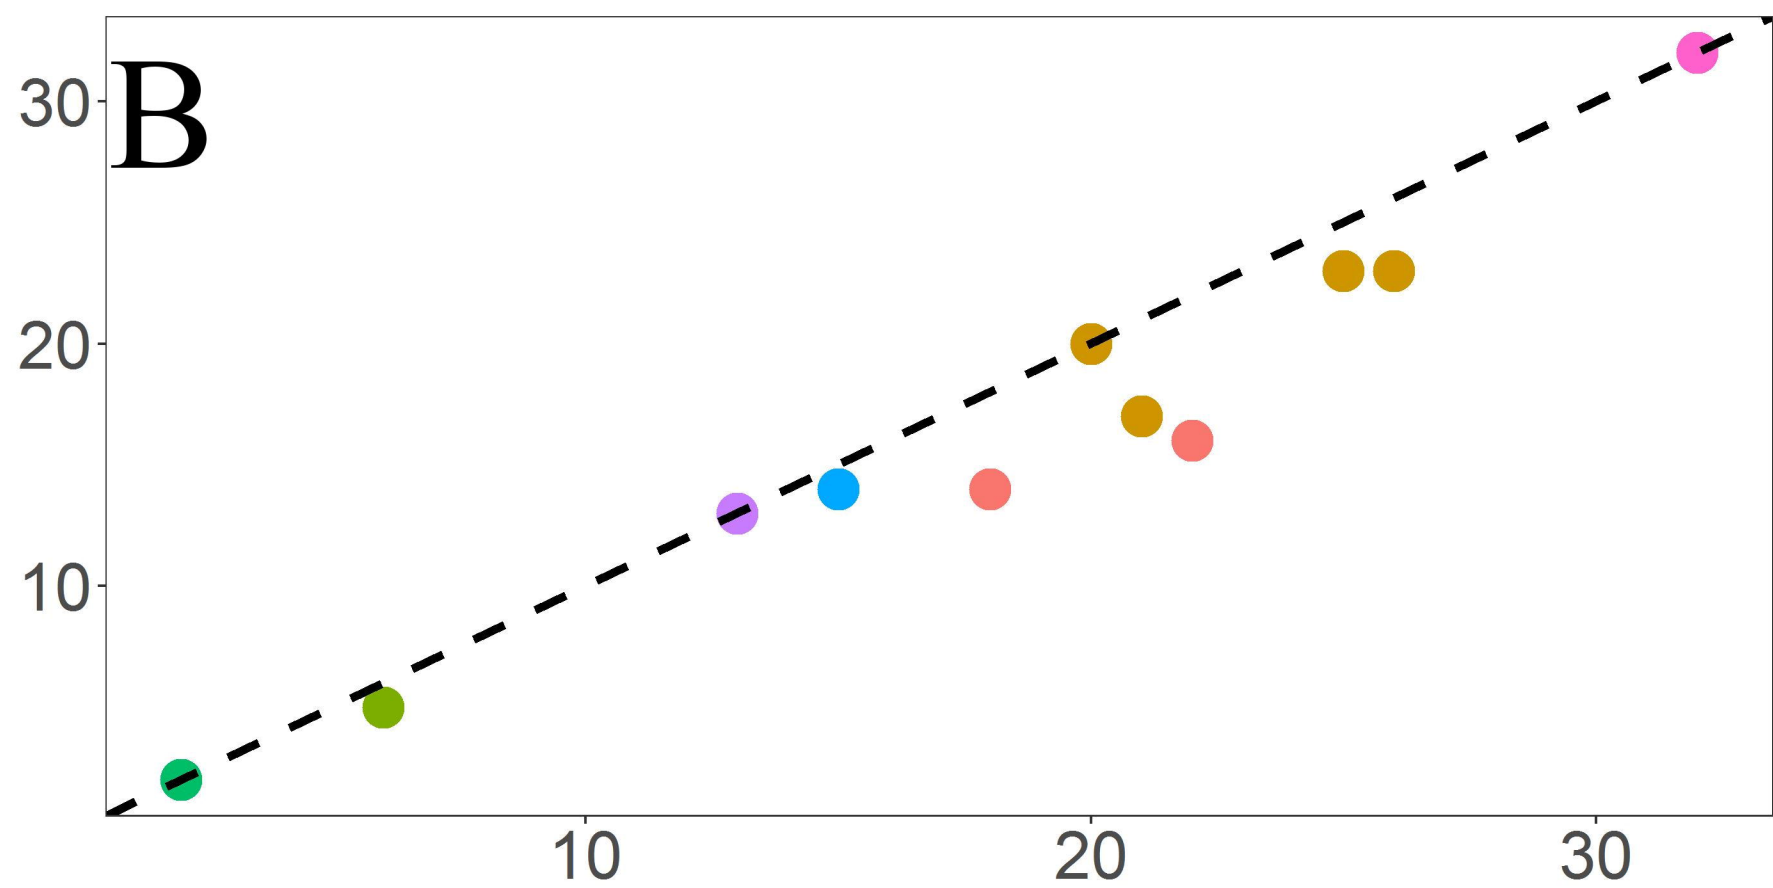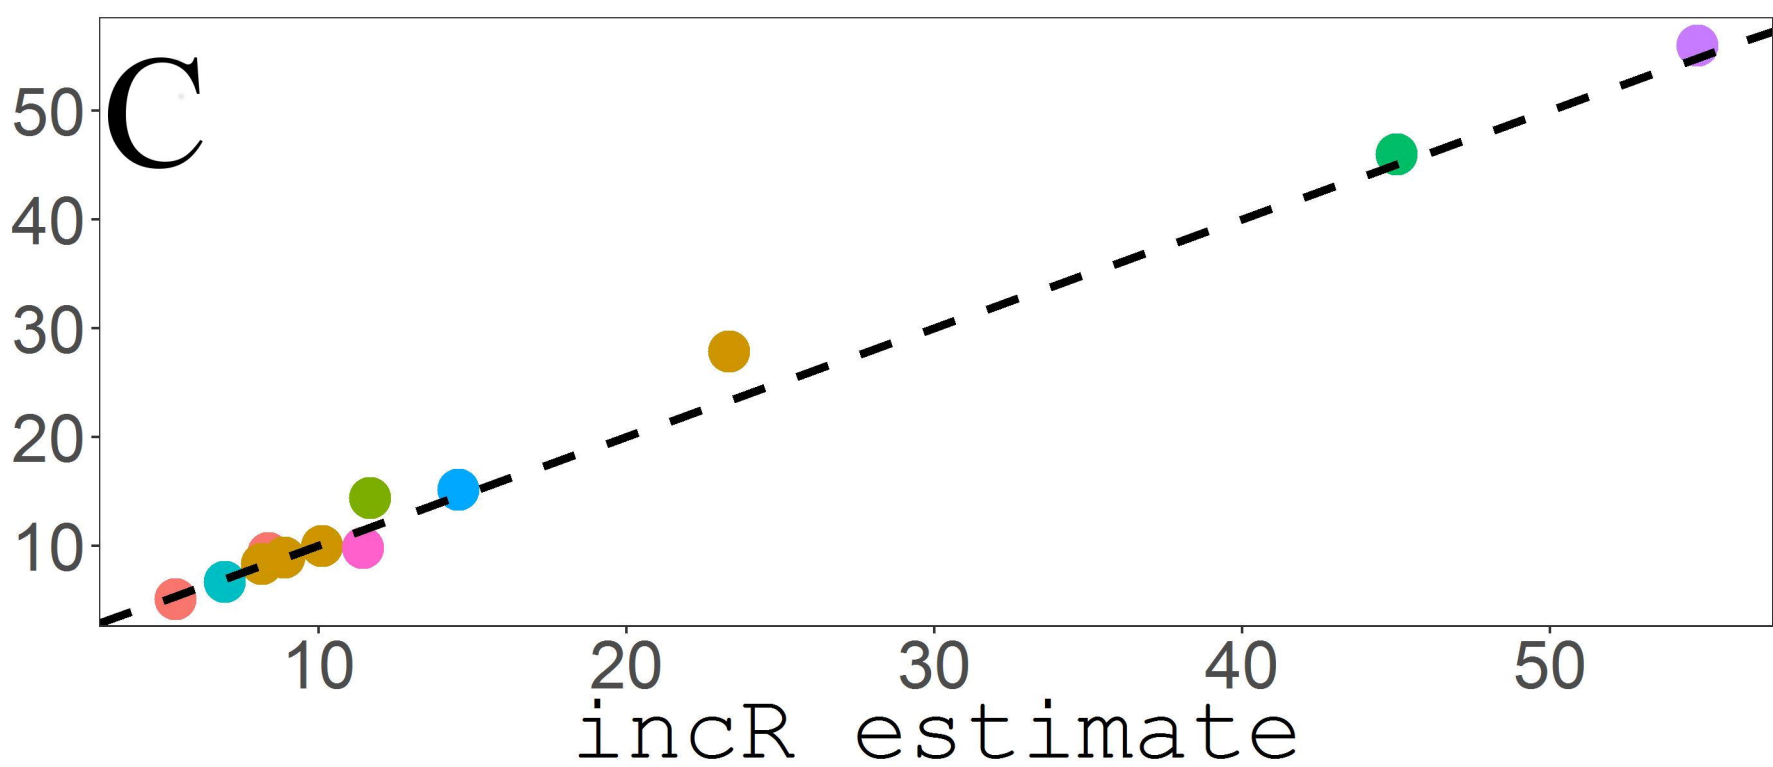

● G173\_GT   
 ● NL1\_GT   
 ● NL62\_GT   
 ● G16\_BT  
● G178\_GT   
 ● NL14\_GT   
 ● NL74\_GT   
 ● G22\_BT
